## Invertebrate Biology

### Defecation by the ctenophore *Mnemiopsis leidyi* occurs with an ultradian rhythm through a single transient anal pore

|                               |                                                           |
|-------------------------------|-----------------------------------------------------------|
| Journal:                      | <i>Invertebrate Biology</i>                               |
| Manuscript ID                 | InvBio-2018-Sep-071.R1                                    |
| Manuscript Type:              | Original Manuscript                                       |
| Date Submitted by the Author: | 08-Oct-2018                                               |
| Complete List of Authors:     | Tamm, Sidney; Marine Biological Laboratory, Bell Center   |
| Keywords:                     | Ctenophores, Defecation, Transient anus, Ultradian rhythm |
|                               |                                                           |

SCHOLARONE™  
Manuscripts

Review

1  
2  
3  
4  
5  
6  
7  
8  
9  
10  
11  
12  
13  
14  
15  
16  
17  
18  
19  
20  
21  
22  
23  
24  
25  
26  
27  
28  
29  
30  
31  
32  
33  
34  
35  
36  
37  
38  
39  
40  
41  
42  
43  
44  
45  
46  
47  
48  
49  
50  
51  
52  
53  
54  
55  
56  
57  
58  
59  
60

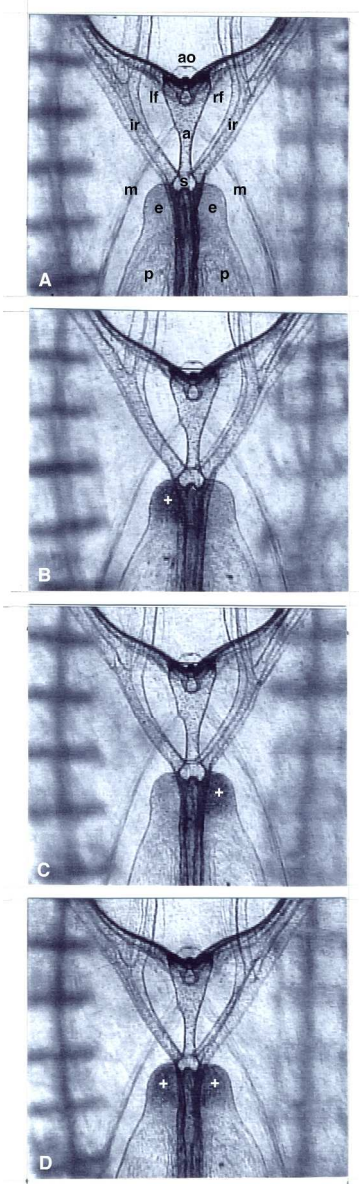

1

82x270mm (300 x 300 DPI)

1  
2  
3  
4  
5  
6  
7  
8  
9  
10  
11  
12  
13  
14  
15  
16  
17  
18  
19  
20  
21  
22  
23  
24  
25  
26  
27  
28  
29  
30  
31  
32  
33  
34  
35  
36  
37  
38  
39  
40  
41  
42  
43  
44  
45  
46  
47  
48  
49  
50  
51  
52  
53  
54  
55  
56  
57  
58  
59  
60

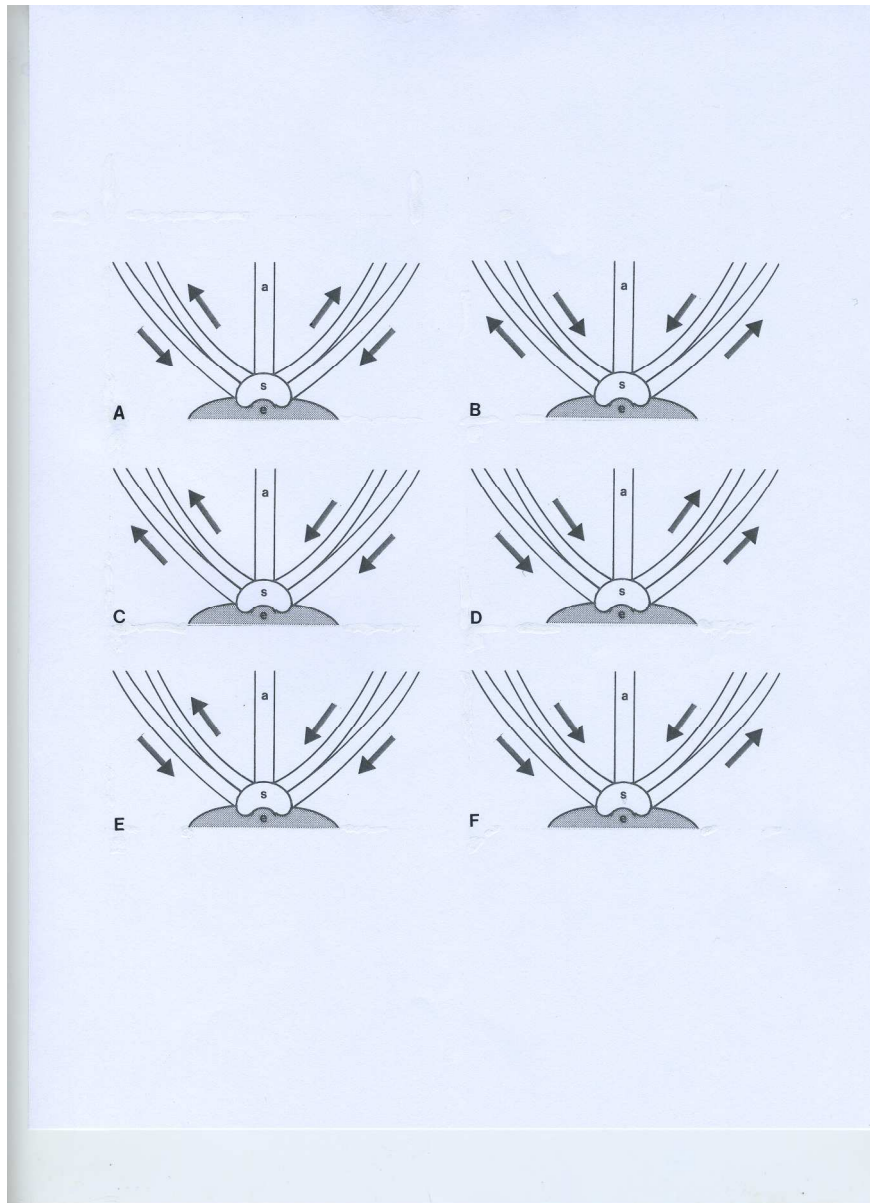

2

215x297mm (300 x 300 DPI)

1  
2  
3  
4  
5  
6  
7  
8  
9  
10  
11  
12  
13  
14  
15  
16  
17  
18  
19  
20  
21  
22  
23  
24  
25  
26  
27  
28  
29  
30  
31  
32  
33  
34  
35  
36  
37  
38  
39  
40  
41  
42  
43  
44  
45  
46  
47  
48  
49  
50  
51  
52  
53  
54  
55  
56  
57  
58  
59  
60

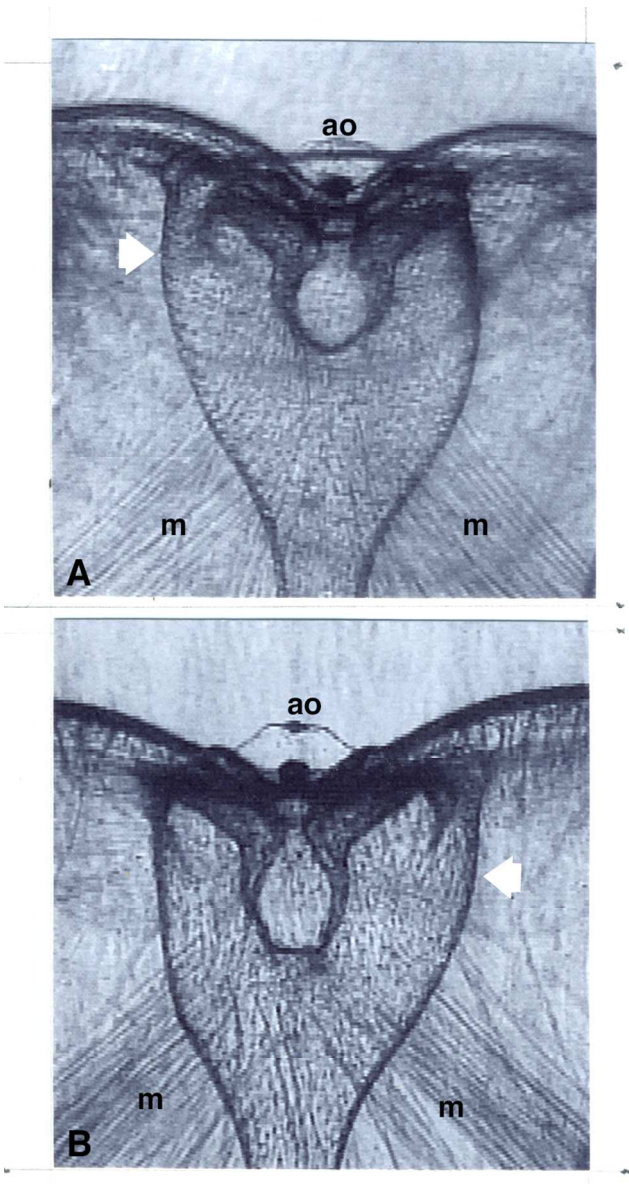

3

73x141mm (300 x 300 DPI)

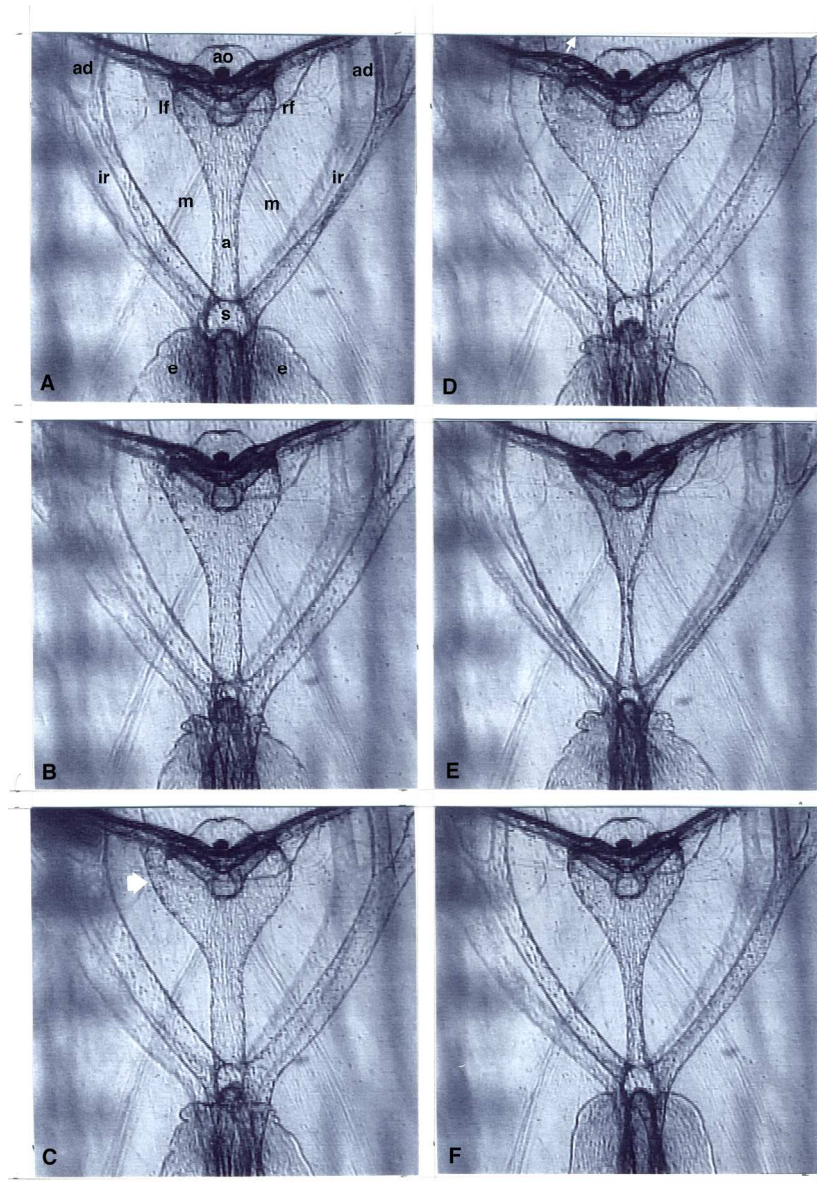

4

162x235mm (300 x 300 DPI)

1  
2  
3  
4  
5  
6  
7  
8  
9  
10  
11  
12  
13  
14  
15  
16  
17  
18  
19  
20  
21  
22  
23  
24  
25  
26  
27  
28  
29  
30  
31  
32  
33  
34  
35  
36  
37  
38  
39  
40  
41  
42  
43  
44  
45  
46  
47  
48  
49  
50  
51  
52  
53  
54  
55  
56  
57  
58  
59  
60

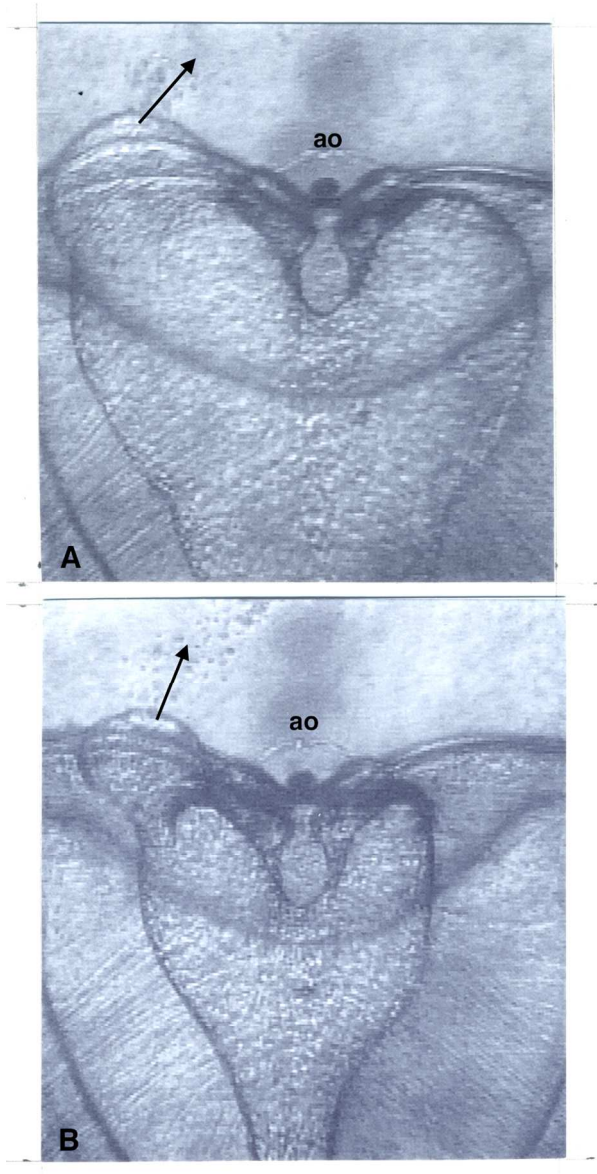

5

83x167mm (300 x 300 DPI)

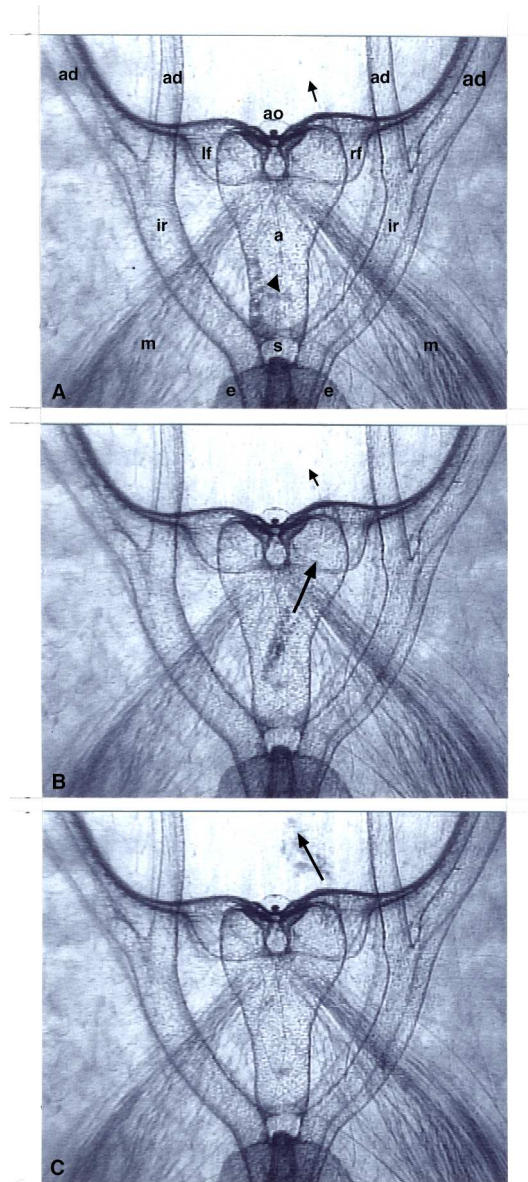

6

107x244mm (300 x 300 DPI)

1  
2  
3  
4  
5  
6  
7  
8  
9  
10  
11  
12  
13  
14  
15  
16  
17  
18  
19  
20  
21  
22  
23  
24  
25  
26  
27  
28  
29  
30  
31  
32  
33  
34  
35  
36  
37  
38  
39  
40  
41  
42  
43  
44  
45  
46  
47  
48  
49  
50  
51  
52  
53  
54  
55  
56  
57  
58  
59  
60

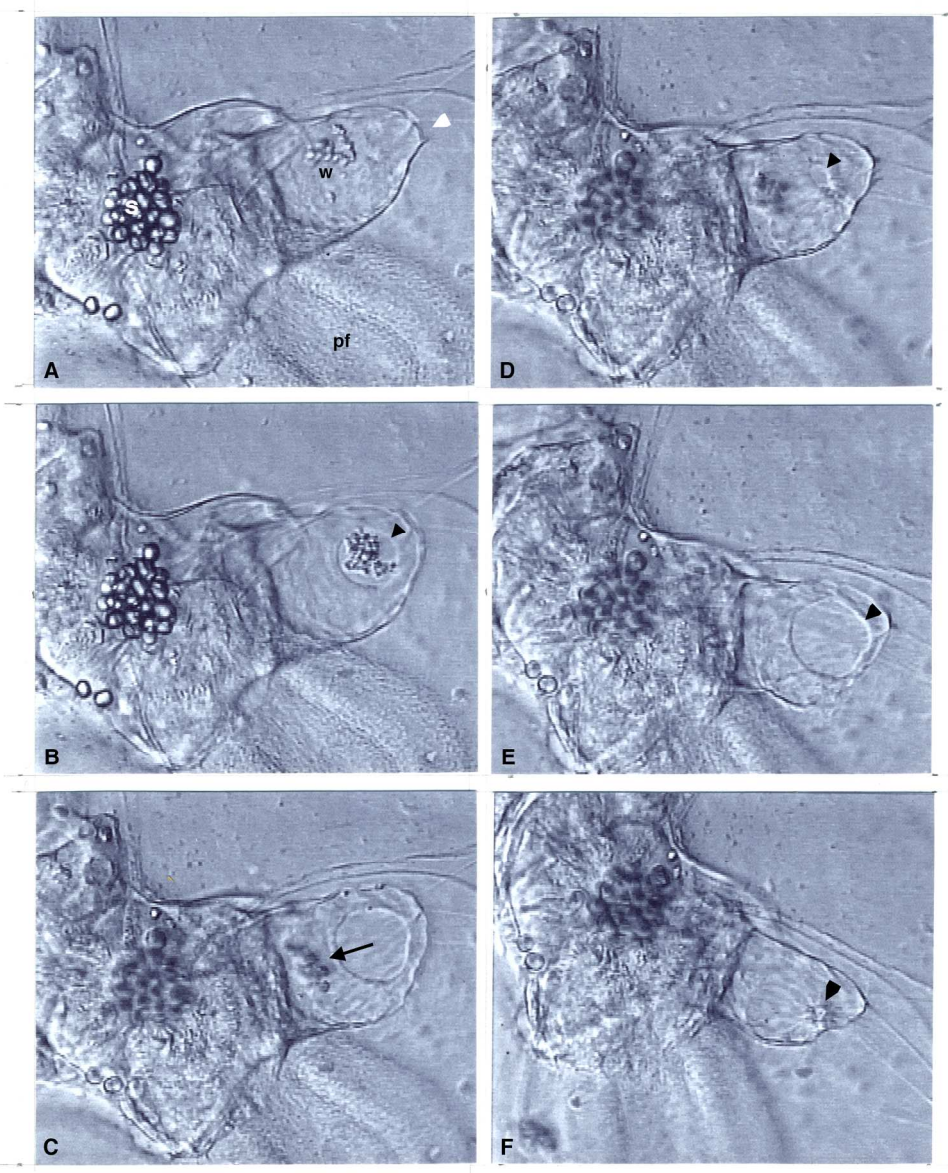

7

185x229mm (300 x 300 DPI)



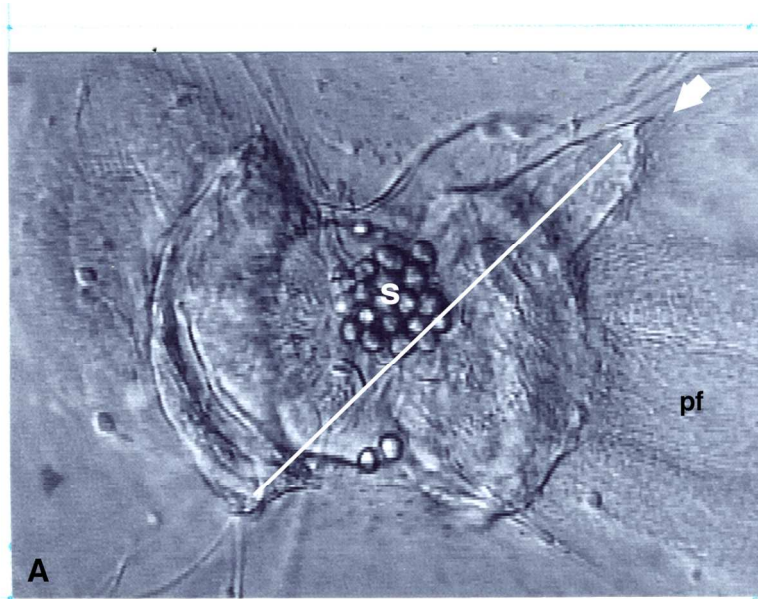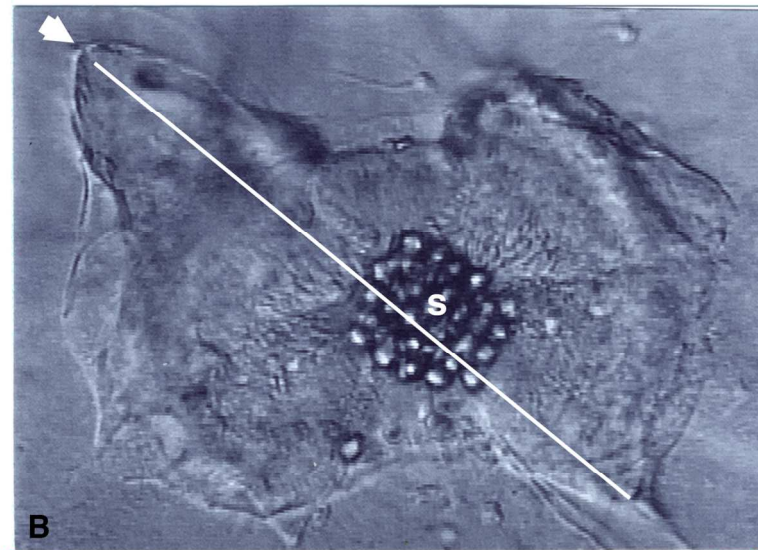

43  
44  
45  
46  
47  
48  
49  
50  
51  
52  
53  
54  
55  
56  
57  
58  
59  
60

8

114x160mm (300 x 300 DPI)

1  
2  
3  
4  
5  
6  
7  
8  
9  
10  
11  
12  
13  
14  
15  
16  
17  
18  
19  
20  
21  
22  
23  
24  
25  
26  
27  
28  
29  
30  
31  
32  
33  
34  
35  
36  
37  
38  
39  
40  
41  
42  
43  
44  
45  
46  
47  
48  
49  
50  
51  
52  
53  
54  
55  
56  
57  
58  
59  
60

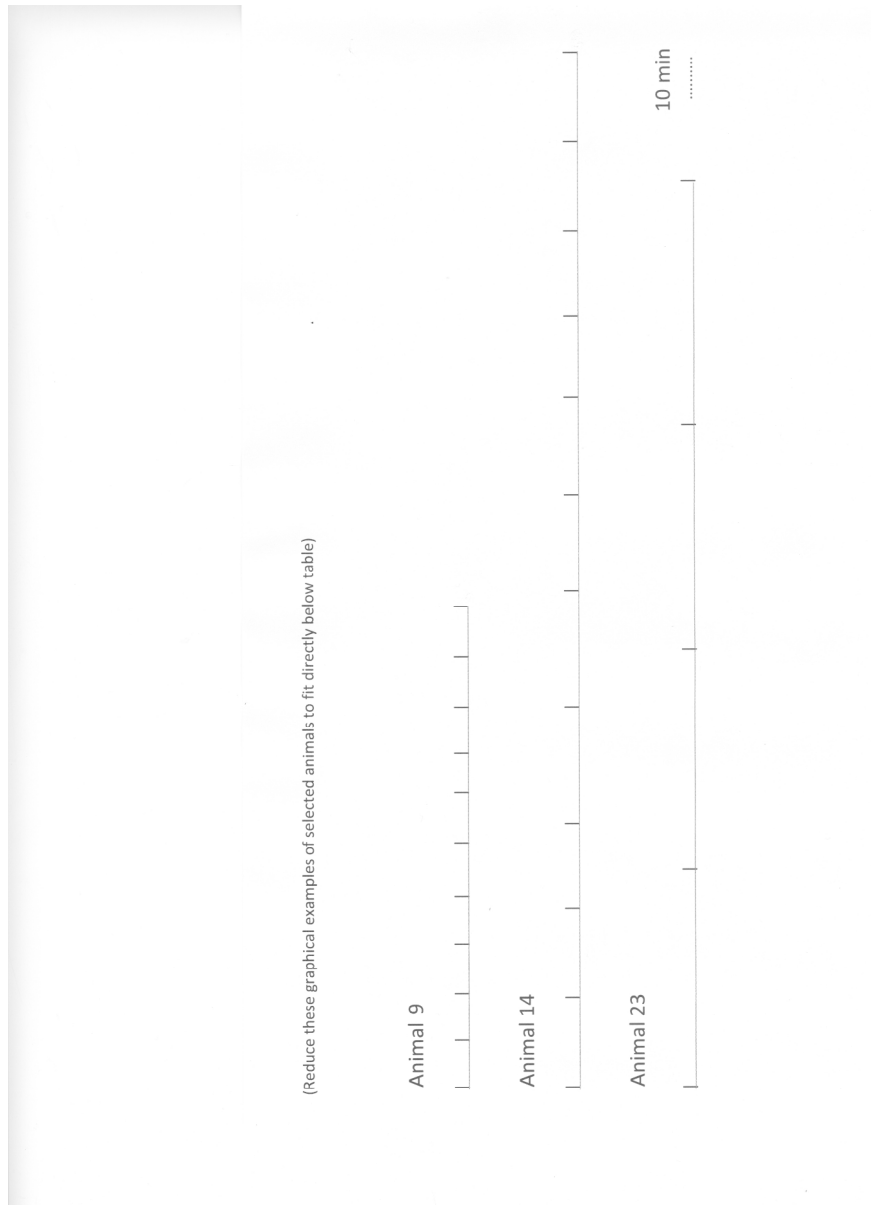

Animal 9  
Animal 14  
Animal 23

10 min

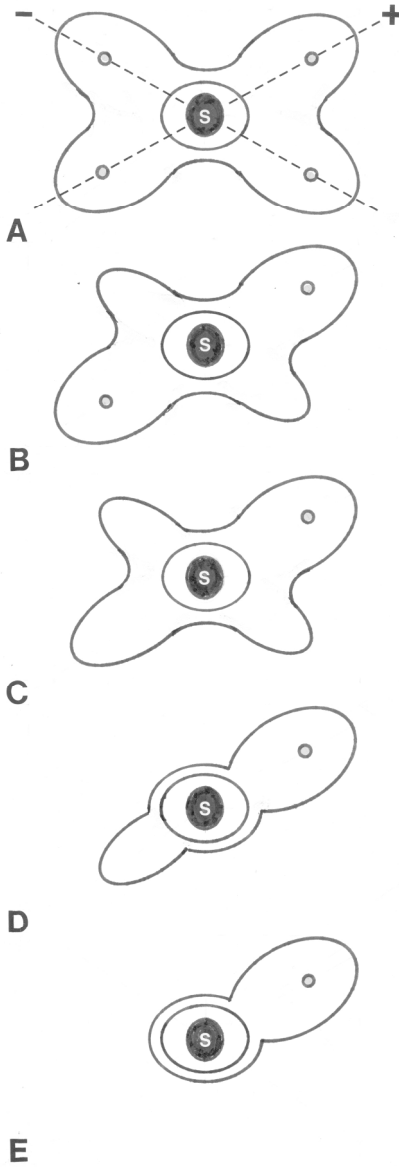

10

110x296mm (300 x 300 DPI)

Table 1. Periodicity of defecation in *Mnemiopsis leidyi*, Individuals are listed by increasing size (body length). Successive interval lengths are shown in order from the first to the last defecation observed, along with the mean interval length ( $\pm 1$  SD). Individuals 2 and 6 had their defecating anal lobe and pore on the negative diagonal (see text). Defecation intervals for individuals 9, 14 and 23 are shown in Fig. 9.

| Individual | Size (cm) | Interval lengths (min)                             | Mean interval length (min) |
|------------|-----------|----------------------------------------------------|----------------------------|
| 1          | 0.18      | 18, 17, 21, 24, 25                                 | 21 $\pm$ 3.5               |
| 2          | 0.20      | 20, 16, 14                                         | 17 $\pm$ 3.1               |
| 3          | 0.20      | 12, 15                                             | 14 $\pm$ 2.1               |
| 4          | 0.25      | 12, 15, 13, 16                                     | 14 $\pm$ 1.8               |
| 5          | 0.30      | 25, 25, 26, 23, 21, 23, 20, 22                     | 23 $\pm$ 2.1               |
| 6          | 0.35      | 16, 15, 18, 18, 19, 22                             | 18 $\pm$ 2.4               |
| 7          | 0.40      | 25, 25, 31, 27                                     | 27 $\pm$ 2.8               |
| 8          | 0.55      | 29, 19, 19                                         | 22 $\pm$ 5.8               |
| 9          | 0.60      | 10, 10, 11, 10, 12, 11, 8, 10, 11, 11              | 10 $\pm$ 1.1               |
| 10         | 0.70      | 19, 11, 13, 14, 24, 18, 21                         | 17 $\pm$ 4.7               |
| 11         | 1.2       | 30, 30, 27, 28, 27, 29                             | 29 $\pm$ 1.4               |
| 12         | 1.2       | 17, 17, 17, 18                                     | 17 $\pm$ 0.5               |
| 13         | 1.3       | 30, 32, 26, 28, 24, 24, 30, 29                     | 28 $\pm$ 2.9               |
| 14         | 1.3       | 21, 21, 20, 28, 27, 23, 23, 19, 20, 21, 21         | 22 $\pm$ 2.9               |
| 15         | 1.3       | 27, 25, 24, 36                                     | 28 $\pm$ 5.5               |
| 16         | 1.5       | 35, 27, 28, 38, 40                                 | 34 $\pm$ 5.9               |
| 17         | 1.7       | 37, 28, 26, 34, 27, 26, 31, 32, 30, 37, 29, 26, 34 | 31 $\pm$ 4.0               |
| 18         | 2.0       | 35, 25, 25, 23                                     | 27 $\pm$ 5.4               |
| 19         | 2.2       | 37, 45                                             | 41 $\pm$ 5.7               |
| 20         | 2.2       | 34, 43, 47                                         | 41 $\pm$ 6.7               |
| 21         | 3.0       | 30, 40, 43, 42, 35                                 | 38 $\pm$ 5.4               |
| 22         | 3.0       | 35, 40, 37                                         | 37 $\pm$ 2.5               |
| 23         | 4.0       | 54, 56, 55, 58                                     | 56 $\pm$ 1.7               |
| 24         | 4.2       | 57, 46, 43, 49, 53                                 | 50 $\pm$ 5.5               |
| 25         | 4.5       | 51, 57, 42, 48, 50, 47                             | 49 $\pm$ 5.0               |
| 26         | 5.0       | 45, 45, 45, 45                                     | 45 $\pm$ 0                 |
| 27         | 5.0       | 56, 55, 56, 61                                     | 57 $\pm$ 2.7               |
| 28         | 5.0       | 60, 52, 58, 63, 57                                 | 58 $\pm$ 4.1               |

1  
2  
3 **REVISION**  
4  
5  
6  
7

8 **Defecation by the ctenophore *Mnemiopsis leidyi* occurs with an ultradian rhythm**  
9  
10 **through a single transient anal pore.**  
11  
12  
13

14  
15 **Running Title:** Defecation in Ctenophores  
16

17 **Key Words:** Ctenophores, Defecation, Transient anus, Ultradian rhythm  
18  
19  
20  
21  
22  
23  
24  
25  
26  
27  
28  
29  
30  
31  
32

33 Sidney L. Tamm  
34

35 Marine Biological Laboratory  
36

37 Woods Hole, MA 02543  
38  
39  
40  
41

42 tamm@bu.edu  
43

44 508/ 548-0360  
45  
46  
47  
48  
49  
50  
51  
52  
53  
54  
55  
56  
57  
58  
59  
60

1  
2  
3 **Abstract.** Defecation in the ctenophore *Mnemiopsis leidyi* is a stereotyped sequence of  
4 effector responses that occur with a regular ultradian rhythm. Time intervals between  
5 repeated defecations of individual animals depend on body size, ranging from ~10 min in  
6 small larvae to ~1 hr in large adults. New features and corrections of previous reports of  
7 the gastrovascular system during and between defecations are described in detail by video  
8 microscopy. Contrary to the scientific literature, the defecating organ of the excretory  
9 complex is just one of the two anal canals which possesses the animal's only anal pore.  
10 The anal pore is not visible as a permanent structure as depicted in textbooks, but appears  
11 at defecation and disappears afterward. DIC microscopy reveals that opening and closing  
12 of the anal pore resemble a reversible ring of tissue fusion between apposed endodermal  
13 and ectodermal layers at the aboral end. *Mnemiopsis* thus appears to have an intermittent  
14 anus and therefore an intermittent through-gut that reoccur at regular intervals. The  
15 temporality of a visible anal pore in *Mnemiopsis* is novel, and may shed light on the  
16 evolution of a permanent anus and through-gut in animals. In addition, mirror image  
17 dimorphism of the diagonal anal complex occurs in larval ctenophores but not in adults,  
18 indicating developmental flexibility in diagonal symmetry of the anal complex.  
19  
20  
21  
22  
23  
24  
25  
26  
27  
28  
29  
30  
31  
32  
33  
34  
35  
36  
37  
38  
39  
40  
41  
42  
43  
44  
45  
46  
47  
48  
49  
50  
51  
52  
53  
54  
55  
56  
57  
58  
59  
60

1  
2  
3 Many aspects of the functional morphology of ctenophores with regard to sponges,  
4  
5 placozoans and cnidarians remain poorly understood, and are essential for understanding  
6  
7 the early evolution of animals as integrated organisms (Dunn and Ryan, 2015). Evolution  
8  
9 of the gut is a prime example. Contrary to a recent version of the historical record  
10  
11 (Presnell et al., 2016), the prevailing consensus in both the scientific literature and  
12  
13 textbooks is that the ctenophore gut is not a blind sac with a single opening (bottle-gut),  
14  
15 but a through-gut with mouth and separate anus (Barnes, 1980; Brusca and Brusca, 1990;  
16  
17 Bumann and Puls, 1997; Dunn et al., 2015; Franc, 1972; Hernandez-Nicaise, 1991;  
18  
19 Hyman, 1940; Mayer, 1912; Main, 1928; Pearse, et al., 1987; Sullivan, 2010; Tamm,  
20  
21 2014a, 2016). This has been well known since the classic studies by Agassiz (1850) and  
22  
23 Chun (1880), and was **one of the reasons** why Hyman (1940) set up Ctenophora as a  
24  
25 separate phylum instead of remaining a subgroup of Coelenterata (now Cnidaria).  
26  
27  
28  
29

30  
31 Nevertheless, many structural and functional features of the ctenophore  
32  
33 gastrovascular system remain incompletely or incorrectly described. Here I report new  
34  
35 features and correct past studies of the gastrovascular system in the ctenophore  
36  
37 *Mnemiopsis leidyi*, and show that defecation occurs through only a single anal pore which  
38  
39 appears and disappears with a regular ultradian rhythm.  
40  
41  
42  
43

## 44 **Background**

45  
46  
47 Ctenophores are important members of the marine zooplankton (Haddock, 2007;  
48  
49 Harbison, et al., 1978; Harbison and Madin, 1982). They have 180° rotational symmetry  
50  
51 in any plane through the oral-aboral axis (except for the anal complex), with the mouth at  
52  
53 the front end and a sensory-motor statocyst or apical organ at the aboral pole (Dunn, et  
54  
55  
56  
57  
58  
59

al., 2015; Hernandez-Nicaise, 1991; Tamm, 1982, 2014a, 2014b, 2015). Two orthogonal planes run along the oral-aboral axis: the sagittal plane in which the flattened elongated pharynx or stomodaeum lies, and the tentacular plane passing through the two tentacle pouches. Most organ systems are bilateral with respect to either the sagittal or tentacular plane.

Embryonic development and hatching leads to free-swimming larvae which, except in beroids, resemble the cydippid *Pleurobrachia*. When cydippid larvae of *Mnemiopsis* reach a size of ~5 mm long, two developing lobes appear in the sagittal plane on either side of the mouth, marking the transition from cydippid to lobate body plans. Progression to the lobate form continues with larval growth and typically is attained in 1.2 - 1.5 cm larvae (Tamm, 2012b). Later stages of growth are referred to here as young animals and adults.

The gastrovascular system of ctenophores consists of six distinct parts (see also Hyman, 1940; Main, 1928; Mayer, 1912): a muscular ciliated mouth with lips, a long flattened stomodaeum (pharynx) with muscular folds, a turtleneck-shaped esophagus with medial lappets, a centrally located stomach (funnel or infundibulum), a branching food canal distribution system, and an aboral canal-anal canal excretory complex. Each portion of the hexapartite gastrovascular system is anatomically and physiologically specialized to perform a distinct function in food processing.

Following ingestion of prey by various means in different orders (Colin, et al., 2010; Haddock, 2007; Harbison and Madin, 1982; Harbison, et al., 1978; Moss, 1991; Swanberg, 1974; Tamm, 1982, 2014a; Tamm and Moss, 1985; Tamm and Tamm, 1987, 1991; Waggett and Costello, 1999), consecutive phases of extracellular digestion take



1  
2  
3 place in an oral-aboral sequence along the stomodaeum (Bulman and Pils, 1997). Bulky  
4 indigestible food fragments (exoskeletons, bones, etc) never enter the canal system and  
5  
6 are transported backwards along the edges of the stomodaeum and ejected through the  
7  
8  
9  
10 mouth (Main, 1928; Bulman and Pils, 1997).

11  
12 The esophagus at the aboral end of the stomodaeum acts as a gastric mill or food  
13  
14 processor to break up pre-digested prey. Its lateral shoulders are lined with hammer-  
15  
16 headed compound cilia arranged in circular arrays on each side (Tamm, 2014a).  
17  
18 Presence of food in the aboral region of the stomodaeum is usually accompanied by  
19  
20 widespread activation and vigorous beating of the esophageal cilia, causing  
21  
22 countercurrent whirling on opposite shoulders and maceration of the pre-digested prey  
23  
24 into small food particles which are swept into the stomach by two medial ciliated lappets,  
25  
26 which serve as filters as well as valves for food particle flow into the stomach.  
27  
28  
29

30  
31 **Distribution of food from the stomach to various parts of the body, and detailed**  
32  
33 **description of defecation of waste products by the anal complex, are reported in Results.**  
34  
35

## 36 37 38 **Materials and methods**

### 39 40 **Organisms**

41  
42 *Mneiopsis leidy* A. Agassiz, 1856, were carefully dipped from the surface of the  
43  
44 sea at Woods Hole, Massachusetts. Animals were used immediately for observations or  
45  
46 kept briefly in seawater for observations later the same day. Free-swimming larvae **and**  
47  
48 **young animals** in the plankton were collected from flat-bottomed glass bowls of fresh  
49  
50 seawater under a stereomicroscope. Animals were not fed and were observed under  
51  
52  
53  
54 standard laboratory conditions.  
55  
56  
57  
58  
59

## Video microscopy

Individual ctenophores were pinned in the sagittal plane in a Sylgard-floored glass fingerbowl or petri dish of seawater and observed under a Wild stereomicroscope. The gastrovascular system was imaged with a phototube-mounted digital video camera connected to a VCR with a timer and frame/field counter allowing still field (17 ms) playback and printing of VHS tapes (Tamm, 2012a, b). Living transverse thick sections of adults containing the anal complex were dissected and placed aboral pole upward in a petri dish of seawater for stereomicroscopy. Larvae were observed in different orientations on Vaseline-ridged well slides of seawater and imaged by Zeiss DIC (Differential Interference Contrast) video microscopy.

## Analysis

Timing of gastrovascular events was determined by playback analysis of video tapes with an audio track and illustrated notes transcribed during observations. Intervals between repeated defecations of individual animals were timed to the nearest minute. The stereotyped sequence of gastrovascular effector responses preparatory to defecation provided an alert to begin video recording of the defecation process. The number of successive defecations followed in different animals varied, depending on the length of intervals and other factors.

## Results

### Interludes between defecations

Nutrient distribution to various parts of the body occurs during interludes between bouts of defecation. A previously undescribed feature of the esophageal cilia is their switching between activation or quiescence on opposite shoulders during interludes (Fig.

1  
2  
3 1). The function and physiological basis of this local control of esophageal ciliary  
4 activity is not yet known.  
5  
6

7  
8 Food particles from the stomach exit into four interradiial canals which run  
9  
10 diagonally into the four quadrants of the body (Figs. 1, 2) and bifurcate into paired  
11  
12 adradial canals. The adradial canals become the meridional canals running under the  
13  
14 eight comb rows. Two paragastric canals run orally on either side of the stomodaeum  
15  
16 (Fig. 1), and two tentacular canals supply the tentacle bulbs. The diameters of the  
17  
18 endodermal canals and the directions of fluid and food particle flow driven by short cilia  
19  
20 lining the canals are regulated and display various patterns of nutrient transport during  
21  
22 interludes. For example, one-way transport of food particles in the interradiial canals may  
23  
24 be directed away from the stomach toward the periphery or in the opposite direction back  
25  
26 into the stomach in various patterns that are coordinated (Fig 2). Transport of food  
27  
28 particles in the meridional canals underlying the comb rows was observed to be  
29  
30 bidirectional during interludes, confirming Gemmill (1918). During interludes most food  
31  
32 particles in the stomach do not enter the aboral canal, or do so only briefly and return to  
33  
34 the stomach. As a result, the aboral canal and anal canals remain almost empty of food  
35  
36 particles between defecations.  
37  
38  
39  
40

#### 41 42 **Anal complex** 43

44  
45 In sagittal views of animals, the aboral canal extends along the oral-aboral axis  
46  
47 from the stomach to the underside of the apical organ where it branches or forks into two  
48  
49 opposing anal canals along the sagittal plane. Each anal fork is asymmetrically bi-lobed  
50  
51 on either side of the apical organ. In sagittal views, the larger and smaller lobes of an  
52  
53 anal canal are seen superimposed in each fork. The shorter lobe is blind and terminates  
54  
55  
56  
57  
58  
59  
60

1  
2  
3 in a dense cap (Fig. 3). One of the two opposed major lobes (in the right or left fork,  
4 depending randomly on which sagittal side is pinned against the Sylgard) appears larger  
5 and closer to the aboral surface than the opposite one during interludes (Fig. 3). It is this  
6 anal canal (or fork) which will later defecate.  
7  
8  
9

10  
11  
12 Aboral views of the anal canals in larval and adult *Mnemiopsis* show the two major  
13 anal lobes opposite one another on a line diagonal to the sagittal and tentacular planes,  
14 while the two smaller capped lobes are opposed on the other diagonal. Again, the two  
15 major lobes are not the same size, and the larger one is used for defecation.  
16  
17  
18  
19  
20

## 21 Defecation

22  
23  
24 Periodic bouts of defecation interrupt and shut down food handling and distribution  
25 in the canal system. Video stereomicroscopic analysis of ctenophores of various sizes  
26 viewed in the sagittal plane (3 mm - 5 cm body length; n = 25) reveals that the earliest  
27 indication of an impending defecation is a change in shape of the stomach. The wide  
28 windshield-shaped stomach characteristic of interludes gradually narrows laterally into a  
29 rectangular box along the oral-aboral axis until it encloses the projecting medial lappets  
30 of the esophagus (Fig. 4). **Before or during stomach narrowing, the field of esophageal**  
31 **cilia becomes predominantly or completely inactive.** The onset of stomach narrowing  
32 was used as a visible signal to begin video recording of defecation, and is designated as  
33 time zero in the following account of sequential stages of defecation (Fig. 4).  
34  
35  
36  
37  
38  
39  
40  
41  
42  
43  
44  
45

46  
47 At 1-2 min, the aboral canal and anal canals, as well as the interradials and  
48 adradials, begin to enlarge in diameter (Fig. 4 B - D). This widening of canals is not due  
49 to contraction of the two fan-shaped bundles of muscles extending orally from under the  
50 apical organ, as reported by Presnell, et al. (2016). To the contrary, these prominent  
51  
52  
53  
54  
55  
56  
57  
58  
59  
60

1  
2  
3 groups of smooth muscles (Figs. 1, 3, 4) arise from a hub beneath the thickened epithelial  
4 floor of the apical organ and terminate orally in the mesoglea, not on canal walls, where  
5 they function to retract the apical organ into the body during avoidance responses to  
6 mechanical stimuli.  
7  
8  
9  
10

11  
12 2-3 min after the onset of stomach narrowing, the smooth shoulders of the  
13 esophagus begin to constrict and become increasingly crumpled or corrugated (Fig. 4B;  
14 see Main 1928), effectively blocking further entry of food particles into the narrowing  
15 stomach. DIC microscopy of small animals in slide preparations shows that widening  
16 (and later narrowing) of the endodermal canals, as well as narrowing (and later widening)  
17 of the stomach, and crumpling (and later relaxation) of the esophageal walls, are not  
18 associated with shortening or extension of any mesogleal muscles.  
19  
20  
21  
22  
23  
24  
25  
26  
27

28 At ~ 3 min, the bidirectional flow of particles in meridional canals characteristic of  
29 interludes becomes directed centrally into the stomach via adradial and interrarial canals,  
30 where circulating particles now begin to enter the aboral and anal canals. The meridional  
31 canals constrict greatly in diameter and are soon emptied of particles. The interrarial  
32 canals, and particularly the aboral canal and major lobes of the two anal canals, continue  
33 to swell (Fig. 4 B, C), becoming densely filled with circulating waste particles. The  
34 larger major lobe of one anal canal (in the left fork or right fork of a given animal,  
35 depending on random pinning of sagittal sides), expands more than the major lobe on the  
36 other side, and moves gradually closer to the aboral surface, which it pushes up as a  
37 rounded protrusion (Fig. 4 C, D; Fig. 5). The endodermal tip of this major lobe becomes  
38 closely apposed to the overlying ectodermal surface, excluding the intervening mesoglea.  
39  
40  
41  
42  
43  
44  
45  
46  
47  
48  
49  
50  
51  
52  
53  
54  
55  
56  
57  
58  
59  
60

1  
2  
3 At the maximum volume attained by the greatly swollen aboral canal and protruding  
4 major anal lobe (at 3-4 min, Fig. 4 D), defecation suddenly begins as a stream of waste  
5 particles exiting the newly appearing anal pore at the tip of the protruding anal lobe (Fig.  
6 4 D; Fig. 5).  
7  
8  
9  
10  
11

12 Approximately 5-10 s after defecation starts, the aboral, anal and interradial canals  
13 begin to narrow in diameter. Circulating particles remaining in the non-defecating major  
14 anal lobe are swept into the defecating one and expelled through its pore. At this time  
15 one or both anal canals/forks sometimes undergoes rapid low-amplitude fluctuations in  
16 diameter for several minutes during waste expulsion. These anal canal pulsations always  
17 occur in the defecating anal canal/fork, and usually in the non-defecating one as well. In  
18 cases where both anal canals/forks pulsate, the pulsations in the defecating one are  
19 usually stronger and more frequent than in the non-defecating one. These vibratory  
20 movements may facilitate discharge from the defecating anal canal and fork. The canals  
21 and anal forks become greatly constricted at the end of defecation (Fig, 4E) and then  
22 slowly widen to the interlude configuration (Fig. 4F).  
23  
24  
25  
26  
27  
28  
29  
30  
31  
32  
33  
34  
35  
36  
37

38 Since waste products entering the stomach and aboral canal come from all four  
39 interradials on both sides of the sagittal plane, a waste particle or clump travelling in a  
40 given interradial may be excreted from the anal canal/fork on that side (ipsilateral) or the  
41 one on the opposite side (contralateral), depending on the side of the defecatory anal  
42 canal/fork. Clumps of incoming waste particles reaching the base of an interradial  
43 always make a sharp turn entering the narrowed stomach, and commonly proceed into the  
44 aboral canal initially on the same side as they entered. If the defecating anal canal/fork  
45 happens to also lie on this side (ipsilateral), the waste clump continues straight up the  
46  
47  
48  
49  
50  
51  
52  
53  
54  
55  
56  
57  
58  
59  
60

1  
2  
3 aboral canal into the anal canal/fork and is expelled. In contralateral cases, however,  
4 waste clumps veer across the aboral canal and are swept into the defecating anal  
5 canal/fork on the opposite side (Fig. 6). This novel and sophisticated example of waste  
6 trafficking is presumed to be driven by a localized change in ciliary activity that diverts  
7 the waste stream into the defecating anal canal.  
8  
9

10  
11  
12  
13  
14  
15 Waste products, particularly large clumps or train-like aggregates, do not always  
16 pass uninterrupted through gastrovascular canals, but sometimes stop briefly and then  
17 resume their journey out through the anal canal. Several instances of temporarily stalled  
18 waste trains have been observed in interradial canals and aboral canals (Fig. 6). The fecal  
19 masses may rotate or circle in place, or simply remain stationary. Local changes in  
20 ciliary activity underlying such stop-and-go waste removal have not yet been imaged.  
21  
22  
23  
24  
25  
26  
27

28  
29 Near the end of a defecation, as the aboral canal and anal canals become progressively  
30 more constricted, any large fecal bolus exiting from the stomach is accompanied by a  
31 propagated widening of the aboral canal wall around the bolus, which is subsequently  
32 excreted. Such temporary increases in canal diameter by large propelled cargo illustrate  
33 the flexibility and elasticity of the endodermal wall to elevations of internal pressure.  
34  
35  
36  
37  
38  
39

#### 40 **Anal pore appearance and disappearance**

41  
42 Aboral views of four 2 - 4 mm long larvae by DIC video microscopy show that  
43 repeated defecations by a larva always involved the same major anal lobe. The aboral  
44 surface of a swollen, about-to-defecate major anal lobe appears uniformly smooth with  
45 no visible structural indication of its future pore (Fig. 7A). As more waste products  
46 accumulate and circulate in the enlarged lobe pressing against the abutting ectodermal  
47 tissue, a tiny circular opening suddenly appears on the outer surface. As the opening  
48  
49  
50  
51  
52  
53  
54  
55  
56  
57  
58  
59  
60

1  
2  
3 increases in diameter, underlying waste particles exit from the lobe in a steady stream.  
4  
5 Larger clumps of fecal matter remain in the lobe until they fit through the expanding pore  
6  
7 and are expelled (Fig. 7B, C). No structural changes in the rim of the pore or the  
8  
9 surrounding surface are evident during opening of a pore, nor are any indications visible  
10  
11 of a ring-like sphincter imagined by Presnell et al (2016).  
12  
13

14  
15 Six of the 16 defecations (~38%) observed in the four larvae involved a single  
16  
17 opening and closing of a pore (one cycle). Four defecations (25%) comprised two  
18  
19 successive cycles of opening and closing of a pore, three defecations (~19%) involved  
20  
21 three cycles of opening and closing of a pore, and three defecations (~19%) involved four  
22  
23 cycles.  
24  
25

26  
27 A pore may open to variable diameters in successive defecations or between cycles  
28  
29 of a single defecation, and fluctuate in size within a cycle. A pore may also pause and  
30  
31 remain open for variable times. Opening or closing of a pore may proceed smoothly or  
32  
33 with intermittent pauses. In addition, the initially circular outline of a pore may be  
34  
35 perturbed into oval or more irregular shapes by changes in lobe configuration during  
36  
37 defecation.  
38  
39

40  
41 Maximum diameters of fully opened pores in the 2 - 4 mm larvae were usually ~ 40  
42  
43  $\mu\text{m}$ . During successive defecations (up to seven) of a single larva, the maximum  
44  
45 diameter of fully opened pores varied. During defecations with multiple cycles, the  
46  
47 maximum open pore diameter varied between cycles, and were usually smallest in the  
48  
49 last cycle.  
50

51  
52 Closing of a pore begins as a decrease in its diameter without apparent structural  
53  
54 changes at its edge or on the surrounding surface. As the pore becomes very small, it  
55  
56  
57  
58  
59



1  
2  
3 becomes surrounded by lines or folds of the surface which radiate from the opening. A  
4 completely closed pore appears as a tiny dense body surrounded by a tight circle of  
5  
6 densities at the center of the radiating lines (Fig. 7F). This characteristic structure then  
7  
8 disappears, leaving no visible sign of the former pore during interludes.  
9  
10

11  
12 At the end of a defecation with a single cycle, or after the last cycle of a defecation  
13 with multiple cycles, the pore closes completely and disappears. Pore closings between  
14 multiple cycles of a defecation are usually complete (13 of 19 or 68%), but sometimes the  
15 pore only closes partially (6 of 19 or 32%).  
16  
17

18  
19 Opening and closing velocities of a given pore are not the same. The fastest speeds  
20 of increases in pore diameter during opening were  $2.5 \pm 0.52 \mu\text{m s}^{-1}$  ( $n = 7$  different  
21 cycles). The fastest speeds of decreases in pore diameter during closing were  $6.4 \pm 1.6 \mu\text{m}$   
22  $\text{s}^{-1}$  ( $n = 6$  different cycles). The speed of pore closing is therefore 2-3 times greater than  
23 the speed of pore opening. An anal pore is thus not permanently visible by light  
24  
25 microscopy in *Mnemiopsis*. Instead, the pore displays a transitory structure that appears  
26 at defecation and disappears during interludes.  
27  
28  
29  
30  
31  
32  
33  
34  
35  
36  
37

### 38 **Duration of defecations**

39  
40 The duration of a defecation increased with body size. Durations ranged from 2–3  
41 min for larvae and young individuals up to ~2 cm long, and 4–6 min for adults 3–5 cm in  
42 body length.  
43  
44  
45  
46

### 47 **One functional anal canal and pore**

48  
49 A new and striking feature of successive defecation cycles observed in all animals  
50 was that defecations always occurred from the same anal canal/fork in a given animal.  
51  
52 No cases of both anal canals/forks defecating, or defecations switching from one anal  
53  
54  
55  
56  
57  
58  
59  
60

canal/fork to the opposite one, were observed. This constancy was observed in more than a dozen repeated defecations by individual animals lasting up to seven hours. Main (1928) briefly reported a similar finding in *Mnemiopsis* based on only several defecations.

To test whether only one of the two opposing anal canals/forks is used for defecation in a given animal, I noted which anal canal/fork (right or left) initially defecates in an adult animal pinned in the sagittal plane. The animal was then unpinned, turned over to the other sagittal side, and re-pinned so that the viewer's right and left anal canal/fork were reversed. Subsequent defecations occurred in the opposite anal canal/fork (i.e., left if previously right and vice versa). Thus, the anal canal/fork which defecates is intrinsic to an animal, independent of which sagittal side is pinned against the Sylgard.

I then tested longer-term constancy of defecation by the same anal canal and fork. To provide an easily visible marker for a defecatory anal canal/fork, a region of the subsagittal comb rows was removed on the side of initial defecation (by right or left anal canal/fork) in 12 animals, which were then unpinned and maintained in running sea water. The wounds healed rapidly and produced easily visible wide gaps between adjacent comb plates on the operated side (Tamm, 2012a). The surgically marked animals were removed daily and pinned in a Sylgard bowl to observe defecation for the next 10 days. In all animals, the anal canal/fork used initially for defecation remained the defecating one. *Mnemiopsis* thus uses the same anal canal/fork and its pore to defecate for at least 10 days.

## Type of diagonal

In aboral views, the defecating and non-defecating major anal lobes lie on a diagonal to the sagittal and tentacular planes. Is this diagonal always the same type, i.e., with a positive slope (bottom left to top right) or with a negative slope (top left to bottom right), or are both types of diagonals found in different animals?

The chondrophore *Verella* possesses a well-known mirror image dimorphism of its diagonal sail, called right-handed or left-handed forms with respect to the downwind sailing direction (Mackie, 1962). Does *Mnemiopsis* possess a similar mirror image dimorphism in the diagonal placement of its major anal lobes?

As described above, the major lobe of one of the two anal canals is larger than the opposite one during interludes and especially at defecations. The type of any diagonal is independent of 180° rotation, but the location of a specific end of a diagonal is reversed by 180° rotation (i.e., for a positive diagonal, top right becomes bottom left). Aboral views of the anal complex in living thick transverse slices from 112 individuals ranging 2–6 cm in body length showed in every case that a greatly swollen defecating lobe with a dilated anal pore expelling waste, or the larger anal lobe of interlude animals, was either at the top right or the bottom left (i.e., near one end of a positive diagonal). Aboral views of eight larvae ranging 2-7 mm long showed six larvae with the defecating pore or the larger interlude anal lobe at the top right or bottom left (i.e., on the positive diagonal as in adults; Figs. 7, 8A). Surprisingly, in two larvae the defecating pore or larger interlude anal lobe was at the top left or bottom right (i.e., on the negative diagonal; Fig. 8B).

Thus, no mirror image dimorphism of the diagonal anal complex was found in a large sample of adult individuals examined. In a much smaller sample of larvae, the anal

pore was on the positive diagonal in most cases but in two cases the pore was on the negative diagonal. **Diagonal anal dimorphism thus occurs in larvae but apparently not in adults.**

### **Defecation rhythm**

Defecation occurs rhythmically at regular time intervals in both larvae maintained on microscope slides and in **older animals** pinned in Sylgard bowls (Table 1, Fig. 9). The time intervals between repeated defecations are generally shorter in smaller animals and longer in larger animals. **The frequency of defecation is thus roughly the inverse of body size** (Table 1, Fig. 9). Time intervals between defecations in individual animals were remarkably uniform regardless of animal size, conditions of observation (pinned or on slides), or the length of observation. Many of the individuals had been feeding before collection, since remains of ingested prey were commonly seen in the stomodaeum and esophagus.

### **Discussion**

Ever since the classic studies by Agassiz (1850) and Chun (1880), it has been well documented that ctenophores do not possess a bottle-gut, but have a through-gut with mouth and separate anus (Tamm, 2016), as confirmed again by Presnell et al, 2016.

However, many important aspects of the gastrovascular system in ctenophores have escaped notice or were incorrectly reported. I show here that the process of defecation in *Mnemiopsis* occurs with an ultradian rhythm using only a single anal pore as the anus. Contrary to the literature, the anal pore of *Mnemiopsis* is not visible by light microscopy during interludes, but appears at defecation and disappears afterward.

1  
2  
3 A basic premise of this study is that changes in the width and flow patterns of  
4 endodermal canals play a major role in food distribution and waste elimination. Stereo  
5 and DIC microscopy demonstrate that changes in canal diameter are not due to attached  
6 mesogleal muscles, as reported by Presnell et al (2016). Nor have muscle cells or  
7 myoendodermal cells been found within the canal walls themselves (Hernandez-Nicaise,  
8 1991; pers. comm., 2016)  
9

10 Widening and narrowing of the canals are more likely due to fluctuations in  
11 hydrostatic pressure within the canal lumens by fluid flow driven by cilia lining their  
12 walls. Franc (1972) found in *Beroe ovata* and *Leucothea multicornis* that an increase in  
13 internal pressure causes progressive expansion of endodermal canals, leading to swelling  
14 of anal canals and opening of anal pores to expel waste products. The venting of fluid  
15 was found to restore normal pressure and diameter of canals, leading to closing of anal  
16 pores. Injecting sea water into meridional canals to artificially increase internal pressure  
17 in the gastrovascular system produced the same events (Franc, 1972). These experiments  
18 indicate that swelling and narrowing of endodermal canals as well as opening and closing  
19 of anal pores are due to changes in hydrostatic pressure within the gastrovascular system.  
20 Changes in shape of the stomach and corrugation of the esophageal walls in *Mnemiopsis*,  
21 however, are probably due to intracellular contractile elements within these organs.  
22

23 A major unsolved problem is how the ciliary motor responses underlying the  
24 patterns of observed fluid and particle flow in the gastrovascular system are initiated and  
25 controlled during interludes and defecations. Recent immunofluorescence staining of the  
26 nervous system of *Pleurobrachia pileus* has not revealed an endodermal nerve net (Jager  
27  
28  
29  
30  
31  
32  
33  
34  
35  
36  
37  
38  
39  
40  
41  
42  
43  
44  
45  
46  
47  
48  
49  
50  
51  
52  
53  
54  
55  
56  
57  
58  
59  
60

et al., 2011). Conduction pathways mediating coordination and control of gastrovascular responses in *Mnemiopsis* remain a fruitful subject for future investigations.

### **The dynamic anal pore**

Video imaging of defecation in *Mnemiopsis* revealed that a new pore suddenly appears and opens between the closely apposed endodermal and ectodermal layers at the tip of the protruding major anal lobe, thereby establishing continuity with the external sea water and allowing exit of fecal matter from anal canals. After defecation the pore closes and is not visible during interludes, contrary to their ubiquitous depiction in non-defecating ctenophores in the literature.

This "now-you-see-it-now-you-don't" performance by the anal pore in *Mnemiopsis* is puzzling. Does the pore really disappear completely, i.e., by disassembly and/or breakdown of its components? Or is the closed pore in its final constricted state simply too small to see by the DIC video imaging system used here? The former possibility represents a novel ephemeral pore that rhythmically is lost and regenerates at every defecation. If so, defecation periodicity and duration indicates that *Mnemiopsis* would spend ~90% of its life without an anal structure or through-gut, and thus have an intermittent anus and intermittent through-gut. Such temporality of the anus might provide clues for understanding evolution of a permanent anus and through-gut in animals. The latter possibility of optical limitations hiding a closed pore argues for a permanent anal pore as found in all other animals. Further investigations using more incisive approaches are required to settle this matter (see below).

The mechanism of anal pore function is also puzzling. By DIC microscopy of working anal pores, the enlarging rim of an opening pore resembles an expanding ring of

1  
2  
3 endodermal-ectodermal fusion, and the decreasing rim of a closing pore looks like a  
4  
5 diminishing ring of transepithelial fusion. Such a mechanism, if confirmed by further  
6  
7 investigations, would be the first known example of different germ layers locally and  
8  
9 reversibly melding and separating to form transitory spatial continuities for a  
10  
11 physiological function. By contrast, the anus of other protostomes is a permanent organ  
12  
13 formed by stable fusion of endodermal and ectodermal epithelia at the posterior end of  
14  
15 the embryo.  
16  
17

18  
19 Fluorescence staining of F-actin (Presnell et al, 2016) and myosin II heavy chains  
20  
21 (Dayraud et al, 2012) in the presumed location of anal pore(s) in fixed individuals of  
22  
23 *Mnemiopsis* and *Pleurobrachia* were taken as evidence that anal pores function in a more  
24  
25 conventional manner as permanent ring-like contractile sphincters (Presnell et al, 2016).  
26  
27 Whether DIC microscopy of living anal pores would necessarily discern the formation of  
28  
29 an actin-based sphincter is not clear. Polarized light microscopy that detects weak  
30  
31 birefringence might be more suitable, and perhaps a fluorogenic probe for vital staining  
32  
33 of F-actin, such as SiR-actin, would be useful. But ultrastructural methods using high  
34  
35 pressure frozen tissues are probably the most conclusive way to clarify these questions  
36  
37 about anal pore existence and operation. Ideally, this approach would capture for TEM  
38  
39 identified stages of pore opening, closing and disappearance to image endodermal and  
40  
41 ectodermal epithelial cells during pore function.  
42  
43  
44  
45

46  
47 Franc's (1972) experiments and the present findings indicate that the appearance of  
48  
49 the anal pore is initiated by elevated hydrostatic pressure that causes anal lobe protrusion  
50  
51 and close apposition of endodermal and ectodermal tissue at the tip, leading to local  
52  
53 epithelial fusion to form an enlarging pore. Pore closing and disappearance would then  
54  
55  
56  
57  
58  
59

1  
2  
3 result from a drop in internal pressure after fluid expulsion, leading to separation of the  
4  
5 endodermal and ectodermal epithelial layers and withdrawal of the lobe from the aboral  
6  
7 surface. Ciliary fluid flow may thus regulate hydrostatic pressure in the gastrovascular  
8  
9 system and effect the dynamics of the anal pore.  
10

### 11 12 **Only one functional anal canal and pore in *Mnemiopsis*** 13

14 This study shows that *Mnemiopsis* uses only one of their two bi-lobed anal canals  
15  
16 (forks) to defecate. Except for a brief mention to this effect by Main (1928), all previous  
17  
18 studies of defecation in ctenophores, from Agassiz (1850) and Chun (1880) to Presnell et  
19  
20 al (2016), report that both diagonally opposite major lobes of the two anal canals have  
21  
22 anal pores which defecate, i.e., two functional anal canals and pores (Fig. 10B).  
23  
24

25 I believe this discrepancy may be due to several factors. Firstly, the diagonally  
26  
27 opposite major lobes of the two anal canals look superficially alike at defecation when  
28  
29 both major lobes swell and become filled with waste particles. In randomly oriented  
30  
31 *Mnemiopsis*, either anal canal (right or left fork in sagittal views; top right or bottom left  
32  
33 lobe in aboral views) is as likely as the other one to be used for defecation in an  
34  
35 individual animal, as found here. It is not surprising that Agassiz (1850) and Chun  
36  
37 (1880) believed that both diagonally opposed major anal lobes had pores which  
38  
39 defecated. However, these authors never described two anal pores defecating at the same  
40  
41 time. Nor did Agassiz or Chun describe individual animals switching between alternate  
42  
43 pores to defecate. Without following each anal canal/fork during repeated defecations of  
44  
45 the same animal as done here, previous workers may have mistakenly presumed similar  
46  
47 anal functions for similar anal structures. Agassiz's and Chun's descriptions were  
48  
49  
50  
51  
52  
53  
54  
55  
56  
57  
58  
59  
60



1  
2  
3 adopted by Hyman (1940) in her authoritative textbook, which has served as the basis for  
4  
5 anal anatomy and function in ctenophores (Fig. 10B).  
6

7  
8 A second reason for the discrepancy between my findings and previous studies is  
9  
10 that the pattern of defecation found in *Mnemiopsis* may not occur in all ctenophores. In  
11  
12 fact, preliminary observations on *Pleurobrachia pileus* from Woods Hole, MA reveal that  
13  
14 both major anal lobes have pores which defecate (Tamm, in preparation). The pattern of  
15  
16 defecation in *Mnemiopsis* may thus not be common to all ctenophores. Comparative  
17  
18 investigations of defecation in various types of ctenophores, following the methods used  
19  
20 here, are needed to resolve this matter.  
21  
22

23  
24 Nevertheless, the structural and functional difference found here between the  
25  
26 diagonally opposed major anal lobes is an intriguing exception to the 180° rotational  
27  
28 symmetry of ctenophores (Dunn et al., 2015). This discovery provides a unique body  
29  
30 marker for sidedness in the symmetry plan of *Mnemiopsis* and perhaps other ctenophores.  
31  
32

### 33 **Diagonal types**

34  
35 The present finding that the major anal lobes lie on the positive diagonal of the anal  
36  
37 complex in all adult *Mnemiopsis* and most larvae confirms descriptions of other  
38  
39 ctenophores by Chun (1880), Mayer (1912) and Hyman (1940). It was therefore  
40  
41 surprising that in two larvae the diagonal of the major anal lobes was the negative type.  
42  
43

44 **This mirror image anal dimorphism in several larvae may be related to developmental**  
45  
46 **flexibility in symmetry of the anal complex that for some reason becomes less common**  
47  
48 **in adults.**  
49  
50

## Defecation rhythm

The regular periodicity of defecation found in *Mnemiopsis* (Table 1; Fig. 9) is the first documented example of an ultradian rhythm in the phylum Ctenophora. In contrast, diverse types and functions of ultradian rhythmic behaviors are common and well-studied in Cnidaria (Passano, 1963; Bullock and Horridge, 1965; Anderson, 1985; Mackie, 1980; Satterlie, 1985).

The relative importance of endogenous and exogenous factors in the onset, production and regulation of biological rhythms is a well-studied topic. The rhythmic defecations in *Mnemiopsis* appear to originate within the animal, since they continue under uniform laboratory conditions without feeding or known external stimuli. However, many of the animals had been eating before being collected, so feeding may be an exogenous factor promoting onset of rhythmic defecation. It will be important to test effects of starvation on the initiation and frequency of defecation. The finding that the periodicity of defecation depends roughly on animal size also suggests an endogenous origin of rhythmicity.

## Anal considerations

An interesting question is why the ctenophore gut does not run straight through the body to the anus, but is branched at the anal end. The aboral pole is instead occupied by the statocyst in the apical organ. I believe this may be an evolutionary outcome of competition for the aboral site between two important functional systems: geotaxis vs. defecation by a through-gut. A single statocyst that regulates the activity of eight locomotory comb rows responsible for geotactic behavior would not work effectively if it were located off the aboral-oral body axis (Tamm, 1982, 2014a, 2014b, 2015). An anus,

1  
2  
3 on the other hand, should not be subject to off-center functional constraints. The  
4  
5 statocyst, according to this argument, had evolutionary priority over the anus for first  
6  
7 place at the aboral (south) pole. During embryonic development, the apical organ arises  
8  
9 before the anal complex forms (Mayer, 1912), thereby setting the stage for its later  
10  
11 dominance at the aboral end.  
12  
13

14  
15 It is more difficult to understand the pattern of anal canal branching and anal pore  
16  
17 number and location around the apical organ (Fig. 10). In contrast to the widely accepted  
18  
19 view of two equal major anal lobes and two pores (Fig. 10B), I found that *Mnemiopsis*  
20  
21 has two unequal major lobes, one of which is larger than the other and hosts the single  
22  
23 anal pore at defecation (Fig 10C). What is the present-day functional reason for this  
24  
25 asymmetry? Is this pattern a secondary reduction or loss from an earlier stage with four  
26  
27 equivalent anal canals with four pores on both diagonals (Fig. 10A)? Or is the existing  
28  
29 pattern an intermediate step in the reverse direction from a simpler stage (Fig. 10E) to a  
30  
31 full-blown anal foursome (Fig. 10A)? Unfortunately, fossil records of ctenophores are  
32  
33 disputable (Steve Haddock, MBARI, pers. comm., 2014) and directions of natural  
34  
35 evolution are dialectic and unpredictable.  
36  
37  
38  
39  
40  
41

42 **Acknowledgments.** This research was supported by a gift from the Fund for Science at  
43  
44 MBL. I thank Mark Terasaki, Laurinda Jaffe, John Pearse, Vicki Pearse, Gary Freeman  
45  
46 and **Steve Haddock** for helpful discussion. Comments by the reviewers enhanced the  
47  
48 paper. Molly McQuillan in the Bell Center at MBL kindly scanned the figures.  
49  
50  
51  
52  
53  
54  
55  
56  
57  
58  
59  
60

## References

- Agassiz L 1850. Contributions to the natural history of the Acalephae of North America. Amer. Acad. Arts Sci., Part 2: 313-374.
- Anderson PAV 1985. The comparative electrobiology of gelatinous zooplankton. Bull. Mar. Sci. 37: 460-477.
- Barnes RD 1980. *Invertebrate Zoology*. Fourth Edition. Philadelphia: Saunders/Holt, Reinhart and Winston.
- Brusca RC & Brusca GJ 1990. *Invertebrates*. Oxford, UK: Sinauer Associates.
- Bullock TH & Horridge GA 1965. *Structure and Function in the Nervous Systems of Invertebrates*. Vol. I. San Francisco: W. H. Freeman.
- Bumann D & Puls G 1997. The ctenophore *Mnemiopsis leidyi* has a flow-through system for digestion with three consecutive phases of extracellular digestion. Physiol. Zool. 70: 1-6.
- Chun C 1880. Die Ctenophoren des Golfes von Neapel und der angrenzenden Meeres-Abschnitte. Flora und Fauna des Golfes von Neapel, Vol. 1. Leipzig: Engelmann.
- Colin SP, Costello JH, Hansson LJ, Titelman J & Dabiri JO 2010. Stealth predation and the predatory success of the invasive ctenophore *Mnemiopsis leidyi*. Proc. Natl. Acad. Sci. USA 107: 17223-17227.
- Dayraud C, Alie A, Jager M, Chang P, Le Guyader H, Manuel M & Queinnec E 2012. Independent specialisation of myosin II paralogues in muscle vs. non-muscle functions during early animal evolution: a ctenophore perspective. BMC Evol. Biol. 12: 107-128.
- Dunn CW, Leys SP & Haddock SHD 2015. The hidden biology of sponges and ctenophores. Trends Ecol. Evol. 30: 282-291.

1  
2  
3  
4  
5  
6  
7  
8  
9  
10  
11  
12  
13  
14  
15  
16  
17  
18  
19  
20  
21  
22  
23  
24  
25  
26  
27  
28  
29  
30  
31  
32  
33  
34  
35  
36  
37  
38  
39  
40  
41  
42  
43  
44  
45  
46  
47  
48  
49  
50  
51  
52  
53  
54  
55  
56  
57  
58  
59  
60

Dunn CW & Ryan JF 2015. The evolution of animal genomes. *Curr. Opin. Genetics and Development*. 35: 25-32.

Franc JM 1972. Activités des rosettes ciliées et leur supports ultrastructuraux chez les Cténares. *Z. Zellforsch.* 130: 527-544.

Gemmill JF 1918. Ciliary action in the internal cavities of the ctenophore *Pleurobrachia pileus* Fabr. *Proc. Zool. Soc. Lond.* 1918: 263-265.

Haddock SHD 2007. Comparative feeding behavior of planktonic ctenophores. *Integr. Comp. Biol.* 47: 847-853.

Harbison GR, Madin LP & Swanberg NR 1978. On the natural history and distribution of oceanic ctenophores. *Deep-Sea Res.* 25: 233-256.

Harbison GR & Madin LP 1982. Ctenophora. In *Synopsis and Classification of Living Organisms*. (ed. S. P. Parker), pp. 707-717. New York: McGraw-Hill.

Hernandez-Nicaise M-L 1991. Ctenophora. In *Microscopic Anatomy of Invertebrates*. Vol. 2. Placozoa, Porifera, Cnidaria, and Ctenophora. (ed. F. W. Harrison and J. A. Westfall), pp. 359-418. New York: Wiley-Liss.

Hyman LH 1940. *The Invertebrates: Protozoa through Ctenophora*. Vol. 1. New York: McGraw-Hill.

Jager M, Chiori R, Alie A, Dayraud C, Queinnec E & Manuel M 2011. New insights on ctenophore neural anatomy: Immunofluorescence study in *Pleurobrachia pileus* (Muller, 1776). *J. Exp. Zool. (Mol. Dev. Evol.)* 316: 171-187.

Mackie GO 1962. Factors affecting the distribution of *Velella* (Chondrophora). *Int. Revue des Hydrobiol.* 47: 26-32.

Mackie GO 1980. Jellyfish neurobiology since Romanes. *Trends Neurosci.* 3: 13-16.

- 1  
2  
3 Main RJ 1928. Observations of the feeding mechanism of a ctenophore, *Mnemiopsis*  
4 *leidyi*. Biol. Bull. 55: 69-78.  
5  
6  
7 Mayer AG 1912. *Ctenophores of the Atlantic Coast of North America*. Washington, D.  
8 C.: Carnegie Institution of Washington.  
9  
10 Moss AG 1991. The physiology of feeding in the ctenophore *Pleurobrachia pileus*.  
11 Hydrobiologia 216: 19-25.  
12  
13  
14 Passano LM 1963. Primitive nervous systems. Proc, Natl. Acad. Sci. USA 50: 306-313.  
15  
16  
17 Pearse V, Pearse J, Buchsbaum M & Buchsbaum R 1987. *Living Invertebrates*. Palo  
18 Alto, CA: Blackwell Scientific and Pacific Grove, CA: Boxwood Press.  
19  
20  
21 Presnell JS, Vandepas LE, Warren KJ, Swalla BJ, Amemiya CT & Browne WE 2016.  
22 The presence of a functionally tripartite through-gut in ctenophores has implications for  
23 metazoan character trait evolution. Curr. Biol. 26: 1-7.  
24  
25  
26 Satterlie RA 1985. Central generation of swimming activity in the hydrozoan jellyfish  
27 *Aequorea aequorea*. J. Neurobiol. 16: 41-55.  
28  
29  
30 Sullivan LJ 2010. Gut evacuation of larval *Mnemiopsis leidyi* A. Agassiz (Ctenophora,  
31 Lobata). J. Plankton Res. 32: 69-74.  
32  
33  
34 Swanberg N 1974. The feeding behaviour of *Beroë ovata*. Mar. Biol. 24: 69-76.  
35  
36  
37 Tamm SL 1982. Ctenophora. In *Electrical Conduction and Behaviour in 'Simple'*  
38 *Invertebrates*. (ed. G. A. B. Shelton), pp. 266-358. Oxford, UK: Oxford University  
39 Press.  
40  
41  
42 Tamm SL 2012a. Regeneration of ciliary comb plates in the ctenophore *Mnemiopsis*  
43 *leidyi*. I. Morphology. J. Morphol. 273: 109-120.  
44  
45  
46  
47  
48  
49  
50  
51  
52  
53  
54  
55  
56  
57  
58  
59  
60

- 1  
2  
3 Tamm SL 2012b. Patterns of comb row development in young and adult stages of the  
4 ctenophores *Mnemiopsis leidyi* and *Pleurobrachia pileus*. J. Morphol. 273: 1050-1063.  
5  
6  
7 Tamm SL 2014a. Cilia and the life of ctenophores. Invertebr. Biol. 133: 1-46.  
8  
9  
10 Tamm SL 2014b. Formation of the statolith in the ctenophore *Mnemiopsis leidyi*. Biol.  
11 Bull. 227: 7-18.  
12  
13  
14 Tamm SL 2015. Functional consequences of the asymmetric architecture of the  
15 ctenophore statocyst. Biol. Bull. 229: 173-184.  
16  
17  
18 Tamm SL 2016. No surprise that comb jellies poop. Science 352: 1182.  
19  
20  
21 Tamm SL & Moss AG 1985. Unilateral ciliary reversal and motor responses during prey  
22 capture by the ctenophore *Pleurobrachia*. J. Exp. Biol. 114: 443-461.  
23  
24  
25 Tamm SL & Tamm, S 1987. Massive actin bundle couples macrocilia to muscles in the  
26 ctenophore *Beroë*. Cell Motil. Cytoskeleton 7: 116-128.  
27  
28  
29 Tamm SL & Tamm, S 1991. Reversible epithelial adhesion closes the mouth of *Beroë*, a  
30 carnivorous marine jelly. Biol. Bull. 181: 463-473.  
31  
32  
33 Waggett R & Costello JH 1999. Capture mechanisms used by the lobate ctenophore  
34 *Mnemiopsis leidyi* preying on the copepod *Acartia tonsa*. J. Plankton Res. 21: 2037-  
35 2052.  
36  
37  
38  
39  
40  
41  
42  
43  
44

## 45 **Figure legends**

### 46 Figure 1

47  
48  
49 Patterns of activity of esophageal cilia during interlude in a medial sagittal view of a 2  
50 cm **young animal** (aboral end up). Cilia on opposite sides of the esophagus (e) switch  
51  
52  
53 between quiescence (light gray) and active beating (white plus on dark gray), often  
54  
55  
56  
57  
58  
59  
60

independently (B, C). **The dark structure running down the middle of the esophagus and pharynx represents the superimposed pair of paragastric canals and also pharyngeal folds.**

Ladder-like subtentacular comb rows are out of focus. Photographs are not arranged chronologically; time elapsed from A to D is 10 min. Note apical organ (ao), left and right anal forks (lf, rf), aboral canal (a), stomach (s), interradiial canals (ir), pharynx (p), and retractor muscle bundles (m).

If figure size is 8.75 " high: 6x natural size.

### Figure 2

Diagram of coordinated patterns of one-way transport of food particles in the two pairs of interradiial canals (arrows) during interlude, based on video analysis of a 1.2 cm **young animal** viewed in the sagittal plane. The panels are arranged by related patterns. The aboral canal (a), stomach (s), esophagus with medial lappets (e), and interradiial canals are open to one another in spite of solid lines demarking junctions.

A, B. Opposite directions of flow in each pair of interradiial canals (into vs. out of the stomach).

C, D. Direction of flow is the same in each interradiial pair but opposite to the other pair. Particles go into or out of the stomach in opposing pairs.

E, F. Three interradiial canals have inward particle flow and one canal has outward flow. The outward interradiial canal is different in E vs. F.

### Figure 3

Interlude sagittal views of bi-lobed anal forks/canals on either side of the apical organ (ao) (aboral end up). The larger and smaller lobes of an anal canal are seen superimposed in each fork. The smaller blind lobes have a curved dense cap and are similar in size.



1  
2  
3 Whether a given fork is left or right depends on random orientation (see text). m,  
4 retractor muscle bundle.  
5

6  
7 A. 5 cm animal in which the major lobe of the left fork (white arrow) is larger and closer  
8 to the aboral surface than the major lobe of the right fork which cannot be distinguished.  
9

10  
11 B. 4.2 cm animal in which the major lobe of the right fork (white arrow) is larger than  
12 that of the left fork.  
13  
14

15  
16 If figure size is 6.9 " high: 80x natural size.  
17

18  
19 Figure 4  
20

21 Main stages of defecation in a 1.2 cm **young animal** viewed in the medial sagittal plane  
22 (aboral end up). Note apical organ (ao), left and right anal forks (lf, rf), aboral canal (a),  
23 interradial canals (ir), adradial canals (ad), stomach (s), esophagus (e), retractor muscle  
24 bundles (m) and out-of-focus regions of subtentacular comb rows.  
25  
26

27  
28 A. Configuration at the end of an interlude, just before the onset of stomach narrowing.  
29

30  
31 The left anal fork (lf) is wider than the right fork (rf). Some cilia in the esophagus are  
32 actively beating (darker central regions).  
33  
34

35  
36 B. 2 min later: all canals are swelling and the stomach has narrowed laterally to enclose  
37 the medial lappets of the esophagus. The contracting shoulders of the esophagus are  
38 crumpling and the cilia are quiescent (light gray).  
39  
40

41  
42 C. 3 min later: the canals have swollen further, and the major anal lobe of the left fork  
43 (white arrow) is expanded more than the major lobe in the right fork and is close to the  
44 aboral surface. The esophagus is constricted, blocking further entry of food into the  
45 narrowed stomach.  
46  
47  
48  
49  
50  
51  
52  
53  
54  
55  
56  
57  
58  
59  
60

1  
2  
3 D. 3.5 min later: the major anal lobes and all canals have reached their maximum  
4  
5 volume. The greatly swollen major lobe of the left fork has pushed up the aboral surface  
6  
7 and is now defecating (white arrow).  
8  
9

10 E. 5.5 min later: both anal forks and all canals are greatly narrowed, and defecation has  
11  
12 ended. Esophageal walls remain corrugated and their cilia are inactive.  
13

14 F. 8.5 min later: the anal forks, all canals and the stomach have widened, approaching  
15  
16 the interlude configuration. The esophageal walls have relaxed and are smooth, but the  
17  
18 cilia are not yet beating. The retractor muscle bundles do not shorten or change their  
19  
20 appearance in the figure during swelling or constriction of the anal forks and canals.  
21  
22

23  
24 If figure size is 8.25 " high: 26x natural size.  
25

### 26 Figure 5

27  
28 Successive stages of defecation by the greatly swollen major anal lobe in the left fork of  
29  
30 a 5 cm adult animal viewed in the sagittal plane (aboral end up). Retractor muscles  
31  
32 (diverging fibers) originate under the apical organ (ao).  
33

34  
35 A. Maximum volume of the major anal lobes in the forks. The larger lobe in the left fork  
36  
37 pushes up the aboral surface. Waste particles are expelled from the visible anal pore  
38  
39 (arrow).  
40  
41

42 B. 3.8 min later: both major anal lobes and the aboral canal have narrowed, revealing the  
43  
44 densely capped blind lobe in each fork. The left major lobe is still protruding and its  
45  
46 open pore continues to defecate (arrow).  
47  
48

49 If figure size is 6.9 " high: 80x natural size.  
50  
51  
52  
53  
54  
55  
56  
57  
58  
59  
60

1  
2  
3 Figure 6  
4

5 Contralateral excretion of waste clumps in a 4.2 cm adult animal viewed in the sagittal  
6 plane (aboral end up). Note apical organ (ao), left and right anal forks (lf, rf), aboral  
7 canal (a), stomach (s), interradiial and adradial canals (ir, ad), esophagus (e), and retractor  
8 muscle bundles (m). The major anal lobe of the right fork is greatly swollen and has  
9 pushed up the aboral surface during defecation (arrows). The capped blind lobe in each  
10 fork is also visible under the aboral end.  
11  
12  
13  
14  
15  
16  
17  
18

19 A. A train of waste clumps from a left interradiial canal had turned through the stomach  
20 and is stalled briefly along the left side of the aboral canal (black arrowhead).  
21  
22

23  
24 B. The waste train slants across the aboral canal towards the enlarged defecating right  
25 fork (arrow).  
26  
27

28 C. The waste train is expelled through the right fork (arrow).  
29  
30

31 If figure size is 8 " high: 6x natural size.  
32

33 Figure 7  
34

35 Anal pore opening and closing during the first 2 cycles of a 4 cycle defecation by a 0.18  
36 cm larva (aboral DIC view). The cellular statocyst (s) lies at the center of the bow-tie  
37 shaped opposing bi-lobed anal canals. The swollen defecating major anal lobe (white  
38 arrowhead) is at the top right of the positive diagonal (see Fig. 8A). A polar field (pf) is  
39 visible on one side of the sagittal axis.  
40  
41  
42  
43  
44  
45

46 A. Accumulated waste particles (w) circulate in the swollen major anal lobe before the  
47 anal pore appears.  
48  
49

50 B. The pore opens (arrowhead) over the waste clump.  
51  
52

53 C. The waste particles (out of focus) are expelled (arrow) from the enlarging pore.  
54  
55  
56  
57  
58  
59  
60

D. The pore closes partially (arrowhead).

E. The pore enlarges again (cycle 2) to a maximum diameter (arrowhead).

F. The pore closes completely (arrowhead). Note the central dense body surrounded by radiating lines (arrowhead). This closed structure later disappears. The larva slowly rotates under the coverslip in E and F.

If figure size is 7.1 " high: 340x.

### Figure 8

Mirror image dimorphism of the diagonal anal complex in interlude larvae (aboral DIC view, sagittal axis horizontal). No anal pore is visible.

A. The 0.18 cm larva of Fig. 7, but during interlude. The larger major anal lobe is at top right (white arrow) on the positive diagonal (white line) intersecting the statocyst (s). pf, polar field on right side.

B. A 0.35 cm larva with the larger major lobe at top left (white arrow) on the negative diagonal (white line).

If figure size is 4.8 " high: 325x.

### Figure 9

Graphical examples of intervals between defecations in selected animals of different sizes: animal 9 (0.6 cm), animal 14 (1.3 cm) and animal 23 (4.0 cm) are from Table 1.

Tick marks indicate onset of defecations. Note that the interval between successive defecations increases with body size.

### Figure 10

1  
2  
3 Hypothetical evolutionary sequence of patterns of interlude anal architecture. Positive  
4 (+) and negative (-) diagonals intersect the statocyst (s). For convenience, pore locations  
5 during defecation are indicated here.  
6  
7

8  
9  
10 A. Possible past or future pattern of four equivalent defecatory major lobes with four  
11 pores.  
12

13  
14 B. Widely accepted pattern (Hyman, 1940) of two equivalent defecatory major lobes  
15 with two pores, and two blind minor lobes.  
16

17  
18 C. Pattern found here: one larger defecatory major lobe with the single anal pore, a  
19 smaller non-defecatory major lobe without a pore, and two blind lobes.  
20  
21

22  
23 D. Possible past or future stage of one defecatory major lobe and one opposite blind  
24 lobe.  
25  
26

27  
28 E. Possible first or last stage in this series with one defecatory major lobe and pore only.  
29  
30  
31  
32  
33  
34  
35  
36  
37  
38  
39  
40  
41  
42  
43  
44  
45  
46  
47  
48  
49  
50  
51  
52  
53  
54  
55  
56  
57  
58  
59  
60
